# Supplementary material
Source: Research Square preprint supplement (doi:10.21203/rs.3.rs-9571979/v1)
Supplement: Supplementary file 1 [file 401cc0b75bf44e8e81de5ddb.docx]

# Extended Data

**Table ED-1:** Summary statistics for each smoke deposition mechanism in each transect, as well across all transects (overall). Using all daily deposition flux values; units are given in mg/m2/day.

| **Transect** | **Mechanism** | **Mean** | **SD** | **Median** | **Q1** | **Q3** | **Min** | **Max** |
| --- | --- | --- | --- | --- | --- | --- | --- | --- |
| **South** | Total | 0.148 | 0.873 | 0.005 | 0.001 | 0.041 | 0 | 34.33 |
| Wet | 0.144 | 0.868 | 0.001 | 0 | 0.037 | 0 | 34.15 |
| Dry | 0.004 | 0.014 | 0.002 | 0 | 0.004 | 0 | 0.606 |
| **South Central** | Total | 0.127 | 0.991 | 0.004 | 0.001 | 0.028 | 0 | 40.44 |
| Wet | 0.123 | 0.984 | 0 | 0 | 0.024 | 0 | 40.33 |
| Dry | 0.004 | 0.013 | 0.002 | 0 | 0.004 | 0 | 0.43 |
| **Kanger** | Total | 0.115 | 0.993 | 0.003 | 0.001 | 0.013 | 0 | 31.54 |
| Wet | 0.111 | 0.982 | 0 | 0 | 0.005 | 0 | 31.26 |
| Dry | 0.004 | 0.013 | 0.002 | 0 | 0.004 | 0 | 0.43 |
| **West** | Total | 0.107 | 0.737 | 0.003 | 0.001 | 0.014 | 0 | 17.39 |
| Wet | 0.103 | 0.732 | 0 | 0 | 0.007 | 0 | 17.27 |
| Dry | 0.004 | 0.009 | 0.002 | 0 | 0.004 | 0 | 0.309 |
| **Central** | Total | 0.077 | 0.599 | 0.004 | 0.001 | 0.024 | 0 | 35.36 |
| Wet | 0.103 | 0.732 | 0 | 0 | 0.007 | 0 | 17.27 |
| Dry | 0.003 | 0.007 | 0.001 | 0 | 0.003 | 0 | 0.245 |
| **Northwest** | Total | 0.064 | 0.597 | 0.002 | 0.001 | 0.006 | 0 | 24.16 |
| Wet | 0.06 | 0.593 | 0 | 0 | 0.001 | 0 | 24.06 |
| Dry | 0.003 | 0.009 | 0.002 | 0 | 0.003 | 0 | 0.256 |
| **Summit** | Total | 0.056 | 0.39 | 0.003 | 0.001 | 0.013 | 0 | 13.54 |
| Wet | 0.053 | 0.387 | 0 | 0 | 0.007 | 0 | 13.5 |
| Dry | 0.003 | 0.007 | 0.002 | 0 | 0.003 | 0 | 0.122 |
| **North** | Total | 0.024 | 0.393 | 0.002 | 0 | 0.005 | 0 | 23.202 |
| Wet | 0.020 | 0.39 | 0 | 0 | 0 | 0 | 2.71 |
| Dry | 0.004 | 0.013 | 0.002 | 0 | 0.004 | 0 | 0.482 |
| **East Central** | Total | 0.017 | 0.092 | 0.002 | 0 | 0.005 | 0 | 2.74 |
| Wet | 0.014 | 0.091 | 0 | 0 | 0 | 0 | 2.71 |
| Dry | 0.003 | 0.008 | 0.002 | 0 | 0.003 | 0 | 0.269 |
| **Northeast** | Total | 0.015 | 0.113 | 0.002 | 0 | 0.005 | 0 | 5.14 |
| Wet | 0.011 | 0.111 | 0 | 0 | 0 | 0 | 5.13 |
| Dry | 0.003 | 0.01 | 0.002 | 0 | 0.004 | 0 | 0.419 |
| **Overall** | Total | 0.075 | 0.658 | 0.003 | 0.001 | 0.01 | 0 | 40.44 |
| Wet | 0.071 | 0.654 | 0 | 0 | 0.004 | 0 | 40.34 |
| Dry | 0.004 | 0.01 | 0.002 | 0 | 0.004 | 0 | 0.606 |

**Table ED-2:** Average annual cumulative smoke deposition and average daily smoke deposition from 2003 – 2023 in each transect, for each deposition mechanism. Count indicates the number of days in the study period multiplied by the number of tiles in each transect.

|  | Count | Average Annual Cumulative Smoke Deposition | | | Average Daily Smoke Deposition | | |
| --- | --- | --- | --- | --- | --- | --- | --- |
| **Total** | **Wet** | **Dry** | **Total** | **Wet** | **Dry** |
| North | 53,690 | 8.67 ± 11.7 | 7.26 ± 11.5 | 1.4 ± 0.62 | 0.024 ± 0.4 | 0.019 ± 0.4 | 0.004 ± 0.01 |
| Northwest | 214,76 | 23.3 ± 21.5 | 22 ± 21.2 | 1.22 ± 0.59 | 0.064 ± 0.6 | 0.022 ±0.6 | 0.003 ± 0.01 |
| Northeast | 138,06 | 5.31 ± 3.6 | 4.1 ± 3.5 | 1.26 ± 0.54 | 0.015 ± 0.1 | 0.011 ± 0.1 | 0.003 ± 0.01 |
| East Central | 153,40 | 6.13 ± 3.2 | 4.95 ± 3 | 1.18 ± 0.51 | 0.017 ± 0.09 | 0.014 ± 0.09 | 0.003 ± 0.01 |
| West | 168,74 | 38.9 ± 33 | 37.5 ± 32.6 | 1.42 ± 0.62 | 0.106 ± 0.7 | 0.103 ± 0.7 | 0.004 ± 0.01 |
| Summit | 176,41 | 20.5 ± 16 | 19.3 ± 15.8 | 1.18 ± 0.50 | 0.056 ± 0.4 | 0.053 ± 0.4 | 0.003 ± 0.01 |
| Central | 161,07 | 28.2 ± 29.6 | 27 ± 29.3 | 1.13 ± 0.51 | 0.077 ± 0.6 | 0.074 ± 0.6 | 0.003 ± 0.01 |
| Kanger | 38,350 | 44.7 ± 67.7 | 43.1 ± 66.6 | 1.68 ± 1.18 | 0.122 ± 1.2 | 0.117 ± 1.7 | 0.005 ± 0.02 |
| South Central | 76,700 | 46.3 ± 61 | 44.9 ± 60.3 | 1.31 ± 0.78 | 0.123 ± 0.99 | 0.123 ± 0.98 | 0.004 ± 0.01 |
| South | 99,710 | 59.4 ± 54 | 57.9 ± 53.3 | 1.47 ± 0.89 | 0.163 ± 1.6 | 0.158 ± 1.6 | 0.004 ± 0.01 |

**Table ED-3a.** Standardized differences in total deposition between pairs of transects from a post-hoc Dunn’s test with Bonferroni corrections showing which transects differ significantly in their deposition amounts (denoted by *; α > 0.05). Negative z-values indicate that the column group’s median deposition is lower than the row group’s median, and vice-versa for positive z-values.

| Total Deposition | | | | | | |
| --- | --- | --- | --- | --- | --- | --- |
|  | **Central** | **East Central** | **Kanger** | **North** | **Northeast** | **Northwest** |
| East Central | 23.1* |  |  |  |  |  |
| Kanger | 8.2* | -14.9* |  |  |  |  |
| North | 26.4* | 3.4* | 18.3* |  |  |  |
| Northeast | 26.9* | 3.8* | 18.7* | 0.46 |  |  |
| Northwest | 18.6* | -4.4* | 10.5* | -7.8* | -8.2* |  |
| South | -7.5* | -30.7* | -15.1* | -34.1* | -34.5* | -26.3* |
| South Central | -2.6 | -25.7* | -10.8* | -29* | -29.5* | -21.7* |
| Summit | 8.4* | -14.6* | 0.17 | -18.1* | -18.5* | -10.3* |
| West | 6.3* | -15.8* | -1.88 | -20.13* | -20.6* | -12.4* |
|  |  |  |  |  |  |  |
|  | **South** | **South Central** | **Summit** |  |  |  |
| South Central | 5* |  |  |  |  |  |
| Summit | 15.9* | 10.9* |  |  |  |  |
| West | 13.9* | 8.9* | -2.1 |  |  |  |

**Table ED-3b.** Standardized differences in wet deposition between pairs of transects from a post-hoc Dunn’s test with Bonferroni corrections showing which transects differ significantly in their deposition amounts (denoted by *). Negative z-values indicate that the column group’s median deposition is lower than the row group’s median, and vice-versa for positive z-values.

| Wet Deposition | | | | | | |
| --- | --- | --- | --- | --- | --- | --- |
|  | **Central** | **East Central** | **Kanger** | **North** | **Northeast** | **Northwest** |
| East Central | 42.7* |  |  |  |  |  |
| Kanger | 27.2* | -15.5* |  |  |  |  |
| North | 58.9* | 16.2* | 31.8* |  |  |  |
| Northeast | 52.9* | 10.2* | 25.8* | -6* |  |  |
| Northwest | 31.3* | -11.5* | 4.2* | -27.5* | -21.5* |  |
| South | -6.3* | -49.1* | -33.5* | -65.3* | -59.3* | -37.6* |
| South Central | 1.73 | -41.1* | -25.4* | -57.2* | -51.2* | -29.5* |
| Summit | 9.2* | -33.5* | -17.9* | -49.8* | -43.8* | -22.2* |
| West | 17.3* | -25.5* | -9.8* | -41.5* | -35.5* | -14* |
|  |  |  |  |  |  |  |
|  | **South** | **South Central** | **Summit** |  |  |  |
| South Central | 8* |  |  |  |  |  |
| Summit | 15.5* | 7.4* |  |  |  |  |
| West | 23.6* | 15.6* | 8.1* |  |  |  |

**Table ED-3c.** Standardized differences in dry deposition between pairs of transects from a post-hoc Dunn’s test with Bonferroni corrections showing which transects differ significantly in their deposition amounts (denoted by *).

| Dry Deposition | | | | | | |
| --- | --- | --- | --- | --- | --- | --- |
|  | **Central** | **East Central** | **Kanger** | **North** | **Northeast** | **Northwest** |
| East Central | 0.22 |  |  |  |  |  |
| Kanger | -6.7* | -6.8* |  |  |  |  |
| North | -4.2* | -4.4* | 2.5 |  |  |  |
| Northeast | -1.3 | -1.6 | 5.4* | 2.8 |  |  |
| Northwest | -2.9 | -3.1 | 3.8* | 1.3 | -1.6 |  |
| South | -5.7* | -5.9* | 1 | -1.5 | -4.3* | -2.7 |
| South Central | -2.9 | -3.2 | 3.7* | 1.2 | -1.6 | -0.1 |
| Summit | -1.9 | -2.2 | 4.7* | 2.2 | -0.6 | 0.9 |
| West | -7.8* | -8* | -1.1 | -3.5* | -6.5* | -4.9* |
|  |  |  |  |  |  |  |
|  | **South** | **South Central** | **Summit** |  |  |  |
| South Central | 2.7 |  |  |  |  |  |
| Summit | 3.7* | 0.99 |  |  |  |  |
| West | -2.1 | -4.8* | -5.8* |  |  |  |

**Table ED-4.** Comparison of cumulative smoke deposition (mg/m2) in 2023 with the 2003–2022 average. 2023 shows cumulative deposition for that year, 2003–2022 shows the 20-year mean with standard error, Z-score indicates how many standard deviations 2023 was above the previous 20-year mean, and magnitude change represents how many times higher deposition was in 2023 compared to the 2003–2022 average.

|  | Total | | | | Wet | | | | Dry | | | |
| --- | --- | --- | --- | --- | --- | --- | --- | --- | --- | --- | --- | --- |
|  | **2023** | **2003 - 2022** | **Z-Score** | **Magnitude Change** | **2023** | **2003 - 2022** | **Z-Score** | **Magnitude Change** | **2023** | **2003 - 2022** | **Z-Score** | **Magnitude Change** |
| South | 231.99 | 50.75 ± 8.44 | 4.8 | 4.57 | 227.12 | 49.45 ± 8.40 | 4.73 | 4.59 | 4.87 | 1.30 ± 0.10 | 8.01 | 3.74 |
| South Central | 301.38 | 33.52 ± 4.01 | 14.93 | 8.99 | 297.12 | 32.35 ± 3.97 | 14.9 | 9.18 | 4.25 | 1.17 ± 0.09 | 7.54 | 3.64 |
| Central | 150.53 | 22.05 ± 2.21 | 13.02 | 6.83 | 148.07 | 20.98 ± 2.17 | 13.1 | 7.06 | 2.46 | 1.07 ± 0.09 | 3.33 | 2.31 |
| West | 96.65 | 36.04 ± 6.94 | 1.95 | 2.68 | 94.44 | 34.66 ± 6.85 | 1.95 | 2.72 | 2.21 | 1.38 ± 0.14 | 1.35 | 1.59 |
| Summit | 65.46 | 18.21 ± 2.81 | 3.75 | 3.59 | 63.55 | 17.06 ± 2.76 | 3.76 | 3.72 | 1.91 | 1.15 ± 0.11 | 1.56 | 1.66 |
| Kanger | 323.54 | 30.79 ± 5.14 | 12.74 | 10.51 | 317.14 | 29.34 ± 5.08 | 12.67 | 10.8 | 6.4 | 1.44 ± 0.11 | 9.99 | 4.43 |
| Northwest | 59.7 | 21.44 ± 4.55 | 1.88 | 2.78 | 58.12 | 20.23 ± 4.48 | 1.89 | 2.87 | 1.58 | 1.21 ± 0.13 | 0.64 | 1.31 |
| Northeast | 12.89 | 4.93 ± 0.72 | 2.47 | 2.61 | 11.59 | 3.68 ± 0.69 | 2.56 | 3.14 | 1.29 | 1.26 ± 0.12 | 0.06 | 1.02 |
| East Central | 15.86 | 5.64 ± 0.54 | 4.27 | 2.81 | 14.42 | 4.48 ± 0.48 | 4.61 | 3.22 | 1.44 | 1.17 ± 0.12 | 0.53 | 1.23 |
| North | 16.79 | 8.26 ± 2.64 | 0.72 | 2.03 | 14.95 | 6.88 ± 2.61 | 0.69 | 2.17 | 1.84 | 1.38 ± 0.14 | 0.72 | 1.32 |

**Table ED-5:** Trends in the annual number of smoke days, smoke events, average annual event duration, and average annual event intensity from 2003 – 2023 for each transect and deposition mechanism. Trends were assessed using linear regressions. Bold italics indicate significant trends.

|  | # Smoke Days | | | # Smoke Events | | | | Avg. Event Duration | | | | Avg. Event Intensity | | | |
| --- | --- | --- | --- | --- | --- | --- | --- | --- | --- | --- | --- | --- | --- | --- | --- |
|  | **Total** | **Wet** | **Dry** | | **Total** | **Wet** | **Dry** | | **Total** | **Wet** | **Dry** | | **Total** | **Wet** | **Dry** |
| North | β =-0.01 p = 0.9 | β = -0.06  p = 0.8 | β = -0.86  p = 0.4 | | β = 0.05  p = 0.5 | β = 0.03 p = 0.8 | β = -0.17  p = 0.2 | | β = -0.01 p = 0.8 | β = -0.03  p = 0.3 | β = -0.01  p = 0.9 | | β = 0.05  p = 0.05 | β = 0.11  p = 0.1 | β = 0.01  p = 0.4 |
| Northwest | β = 0.14 p = 0.8 | β = 0.11 p = 0.8 | β = -0.43  p = 0.5 | | β = -0.01  p = 0.9 | β = 0.03 p = 0.8 | β = 0.06  p = 0.7 | | β = 0.01 p = 0.7 | β = 0.01  p = 0.7 | β = -0.06  p = 0.4 | | β = 0.02 p = 0.1 | β = 0.02 p = 0.1 | β = 0.01 p = 0.9 |
| Northeast | β = 0.28 p = 0.2 | β = 0.28 p = 0.2 | β = -1.76  p = 0.06 | | β = 0.06  p = 0.4 | β = 0.08  p = 0.3 | β = -0.24  p = 0.07 | | β = 0.03 p = 0.3 | β = 0.02  p = 0.2 | β = -0.03  p = 0.8 | | ***β = 0.03 p = 0.01*** | ***β = 0.02 p = 0.04*** | β = 0.01  p = 0.3 |
| East Central | β = 0.11 p = 0.7 | β = 0.09  p = 0.7 | β = -0.92  p = 0.2 | | β = 0.05  p = 0.5 | β = 0.05  p = 0.5 | β = -0.25  p = 0.1 | | β = -0.23  p = 0.4 | β = -0.02  p = 0.5 | β = 0.03 p = 0.6 | | β = 0.01  p = 0.1 | β = 0.01  p = 0.3 | β = 0.01  p = 0.3 |
| West | β = -0.76  p = 0.1 | β = -0.75  p = 0.1 | β = -1.04  p = 0.3 | | β = -0.28  p = 0.08 | ***β = -0.28***  ***p = 0.05*** | ***β = -0.33***  ***p = 0.02*** | | β = 0.01  p = 0.7 | β = 0.01  p = 0.7 | β = 0.03 p = 0.6 | | β = 0.03 p = 0.1 | β = 0.03 p = 0.2 | β = 0.01  p = 0.3 |
| Summit | ***β = -0.97***  ***p = 0.05*** | ***β = -1.07***  ***p = 0.03*** | β = -0.31  p = 0.6 | | ***β = -0.31***  ***p = 0.03*** | ***β = -0.31***  ***p = 0.02*** | β = -0.15  p = 0.2 | | β = 0.01 p = 0.6 | β = 0.01  p = 0.6 | β = 0.07 p = 0.3 | | ***β = 0.02 p = 0.01*** | ***β = 0.02***  ***p = 0.01*** | β = 0.01  p = 0.3 |
| Central | ***β = -1.3 p = 0.02*** | ***β = -1.35***  ***p = 0.01*** | β = -0.56  p = 0.5 | | ***β = -0.42***  ***p < 0.01*** | ***β = -0.37***  ***p < 0.01*** | β = -0.16  p = 0.1 | | β = 0.04 p = 0.1 | β = 0.03 p = 0.2 | β = 0.06 p = 0.4 | | ***β = 0.02 p = 0.02*** | ***β = 0.02 p = 0.02*** | β = 0.01  p = 0.1 |
| Kanger | β = -1.07  p = 0.1 | β = -1.06  p = 0.1 | β = -1.71  p = 0.06 | | ***β = -0.25***  ***p = 0.05*** | β = -0.31 p =0.08 | β = -0.15 p =0.06 | | β = 0.03  p = 0.4 | β = 0.2  p = 0.3 | β = 0.06 p = 0.6 | | ***β = 0.05 p = 0.04*** | **β = 0.05 p =0.09** | β = 0.01 p = 0.4 |
| South Central | ***β = -1.56***  ***p = 0.02*** | ***β = -1.68***  ***p = 0.01*** | β = -1.07  p = 0.2 | | ***β = -0.42***  ***p < 0.01*** | ***β = -0.41 p < 0.01*** | ***β = -0.33***  ***p < 0.01*** | | β = 0.02 p = 0.4 | β = 0.008  p = 0.7 | β = 0.05 p = 0.4 | | ***β = 0.04 p = 0.04*** | ***β = 0.04***  ***p =0.04*** | β = 0.01  p = 0.06 |
| South | ***β = -1.56***  ***p = 0.01*** | ***β = -1.64 p < 0.01*** | β = -1.52  p = 0.06 | | ***β = -0.44***  ***p = 0.02*** | ***β = -0.47***  ***p < 0.01*** | ***β = -0.39***  ***p < 0.01*** | | β = 0.01  p = 0.7 | β = 0.01  p = 0.7 | β = 0.06  p = 0.3 | | ***β = 0.04***  ***p = 0.04*** | ***β = 0.04 p =0.04*** | ***β = 0.01***  ***p < 0.01*** |

**Table ED-6:** Comparison of the annual number of substantial smoke days, annual number of smoke events, average annual event duration, and average annual event intensity pre- and post- 2019 for each transect and deposition mechanism using Wilcoxon rank-sum tests. W indicates whether values tend to be larger in one period than the other, with higher values post-2019 determined by medians. Bold indicates a higher median after 2019 compared to the median before 2019. Significant differences pre- and post-2019 are indicated by italics.

|  | # Smoke Days | | | | # Smoke Events | | | | Avg. Event Duration | | | | Avg. Event Intensity | | |
| --- | --- | --- | --- | --- | --- | --- | --- | --- | --- | --- | --- | --- | --- | --- | --- |
|  | **Total** | **Wet** | **Dry** | **Total** | | **Wet** | **Dry** | **Total** | | **Wet** | **Dry** | **Total** | | **Wet** | **Dry** |
| North | **W = 64**  **p = 0.06** | ***W = 66***  ***p = 0.03*** | W = 43  p = 0.7 | **W = 73**  **p < 0.01** | | **W = 64**  **p = 0.05** | W = 36  p = 0.7 | W = 512  p = 0.6 | | W = 447 p = 0.8 | W = 3005  p = 0.3 | W = 555  p = 0.9 | | **W = 515**  **p = 0.2** | **W = 3075**  **p = 0.2** |
| Northwest | **W = 48**  **p = 0.6** | **W = 47**  **p = 0.6** | **W = 46**  **p = 0.7** | **W = 46**  **p = 0.6** | | W = 47  p = 0.6 | **W = 52**  **p = 0.3** | W = 2837 p = 0.8 | | W = 2743 p = 0.6 | W = 2560  p = 0.7 | **W = 3247**  **p = 0.3** | | **W = 3228**  **p = 0.3** | W = 2612  p = 0.9 |
| Northeast | ***W = 71***  ***p = 0.01*** | ***W = 74***  ***p < 0.01*** | W = 37  p = 0.8 | ***W = 71***  ***p = 0.01*** | | ***W = 75***  ***p < 0.01*** | W = 33  p = 0.56 | W = 707 p = 0.5 | | W = 6945  p = 0.9 | **W = 1917**  **p = 0.5** | ***W = 1048***  ***p < 0.01*** | | ***W = 917***  ***p = 0.01*** | ***W = 2267***  ***p = 0.02*** |
| East Central | **W = 53**  **p = 0.3** | **W = 50**  **p = 0.5** | W = 39  p = 0.9 | **W = 57**  **p = 0.2** | | **W = 55**  **p = 0.2** | W = 35  p = 0.6 | W = 1100  p = 0.5 | | W = 1170  p = 0.8 | **W = 2610**  **p = 0.9** | ***W = 1542***  ***p < 0.01*** | | ***W = 1538***  ***p < 0.01*** | ***W = 4151***  ***p = 0.05*** |
| West | W = 38  p = 0.9 | W = 35  p = 0.7 | W = 38  p = 0.9 | W = 36  p = 0.6 | | W = 28  p = 0.3 | W = 26  p = 0.2 | **W = 6994 p = 0.3** | | **W = 7115 p = 0.4** | ***W = 3724 p = 0.05*** | **W = 7226**  **p = 0.2** | | ***W = 7818***  ***p = 0.05*** | ***W = 4102***  ***p < 0.01*** |
| Summit | W = 24  p = 0.2 | W = 23 p = 0.2 | W = 39  p = 0.9 | W = 22 p = 0.1 | | W = 20  p = 0.1 | W = 25  p = 0.2 | **W = 5571 p = 0.2** | | **W = 5951**  **p = 0.4** | ***W = 2920***  ***p < 0.01*** | ***W = 6145***  ***p = 0.02*** | | ***W = 6776***  ***p = 0.02*** | ***W = 2945***  ***p < 0.01*** |
| Central | W = 41  p = 1 | W = 36  p = 0.7 | W = 38  p = 0.8 | W = 23  p = 0.2 | | W = 23  p = 0.2 | W = 29  p = 0.4 | **W=10064**  **p = 0.1** | | **W=11219p = 0.5** | ***W = 1817***  ***p = 0.05*** | ***W=10702***  ***p = 0.02*** | | **W=12048 p = 0.09** | ***W = 2042***  ***p < 0.01*** |
| Kanger | **W = 38**  **p = 0.9** | **W = 40**  **p = 0.9** | W = 32  p = 1 | W = 33  p = 0.6 | | W = 36  p = 0.8 | W = 20  p = 0.1 | **W = 7022**  **p = 0.3** | | W = 7673  p = 0.3 | **W = 4002**  **p = 0.4** | ***W = 7835***  ***p = 0.02*** | | ***W = 8423***  ***p = 0.02*** | ***W = 4515***  ***p = 0.03*** |
| South Central | W = 37  p = 0.8 | W = 35  p = 0.7 | W = 35  p = 0.7 | W = 24  p = 0.2 | | W = 26  p = 0.2 | W = 24  p = 0.2 | **W=13904**  **p = 0.4** | | **W=13700p = 0.6** | **W = 2712 p = 0.3** | ***W=15496***  ***p = 0.01*** | | ***W=15330 p = 0.03*** | ***W = 2845***  ***p = 0.2*** |
| South | W = 34  p = 0.6 | W = 30  p = 0.4 | W = 30  p = 0.4 | W = 26  p = 0.3 | | W = 22  p = 0.1 | W = 23  p = 0.2 | **W=18090 p = 0.2** | | **W=18693**  **p = 0.2** | **W = 4323**  **p = 0.1** | ***W=18762***  ***p = 0.05*** | | ***W=19513***  ***p = 0.05*** | **W = 4450**  **p = 0.08** |

**Table ED-7:** Comparison of smoke event attributes in 2023 to average using one-sample t-tests for the number of smoke days and smoke events, and Wilcoxon rank-sum tests for average event duration and average event intensity. All smoke days and smoke events have 19 degrees of freedom (t(19)) but are reported as ‘t’ for simplicity in the table. Bold italics indicate significant differences in 2023 compared to the previous 20-year average. Negative t-values indicate more smoke days/events in 2023.

|  | # Smoke Days | | | # Smoke Events | | | | Avg. Event Duration | | | | Avg. Event Intensity | | | |
| --- | --- | --- | --- | --- | --- | --- | --- | --- | --- | --- | --- | --- | --- | --- | --- |
|  | **Total** | **Wet** | **Dry** | | **Total** | **Wet** | **Dry** | | **Total** | **Wet** | **Dry** | | **Total** | **Wet** | **Dry** | |
| North | ***t = -8***  ***p < 0.01*** | ***t = -7.8***  ***p < 0.01*** | ***t = -8 p < 0.01*** | | ***t = -4.5 p < 0.01*** | ***t = -5.5 p < 0.01*** | ***t = -9.9 p < 0.01*** | | W = 190  p = 0.4 | W = 198 p = 0.08 | W=1478 p = 0.27 | | W= 214  p = 0.18 | ***W= 215***  ***p = 0.04*** | W=1420  p = 0.45 | |
| Northwest | ***t = -4.3 p < 0.01*** | ***t = -4.4 p < 0.01*** | ***t = -9.5 p < 0.01*** | | ***t = -5.5 p < 0.01*** | ***t = -6.2 p < 0.01*** | ***t = -18.9 p < 0.01*** | | W = 954 p = 0.59 | W = 941  p = 0.56 | W=1470  p = 0.36 | | ***W=1543***  ***p < 0.01*** | ***W=1523***  ***p < 0.01*** | W=1298  p = 0.94 | |
| Northeast | ***t = -9***  ***p < 0.01*** | ***t = -10.5 p < 0.01*** | ***t = -5***  ***p < 0.01*** | | ***t = -10.7 p < 0.01*** | ***t = -11.9 p < 0.01*** | ***t = -9.9 p < 0.01*** | | W = 224  p = 0.19 | W = 223  p = 0.29 | W = 858  p = 0.65 | | ***W = 420***  ***p = 0.04*** | W = 385  p = 0.06 | W = 886  p = 0.8 | |
| East Central | ***t = -3.4 p < 0.01*** | ***t = -2.6 p = 0.02*** | ***t = -8.7 p < 0.01*** | | ***t = -10.4 p < 0.01*** | ***t = -7.6 p < 0.01*** | ***t = -11.5 p < 0.01*** | | W = 368  p = 0.39 | W = 369  p = 0.72 | W=1280  p = 0.61 | | ***W = 673***  ***p < 0.01*** | ***W = 694***  ***p < 0.01*** | W=1570  p = 0.33 | |
| West | ***t = -5.3 p < 0.01*** | ***t = -5.2 p < 0.01*** | ***t = -8.4 p < 0.01*** | | ***t = -4.1 p < 0.01*** | ***t = -5.1 p < 0.01*** | ***t = -5.3 p < 0.01*** | | W=2589 p = 0.17 | W=2629  p = 0.41 | W=1689  p = 0.04 | | ***W=3039***  ***p < 0.01*** | ***W=3328***  ***p < 0.01*** | W=1645  p = 0.09 | |
| Summit | ***t = -8.5 p < 0.01*** | ***t = -8.2 p < 0.01*** | ***t = -11.2 p < 0.01*** | | ***t = -3.2 p < 0.01*** | ***t = -3.6 p < 0.01*** | ***t = -15.2 p < 0.01*** | | W=2265  p = 0.08 | W=2335  p = 0.28 | W=1394 p = 0.17 | | ***W=2827***  ***p < 0.01*** | ***W=3019***  ***p < 0.01*** | ***W=1556***  ***p = 0.03*** | |
| Central | ***t = -9.1 p < 0.01*** | ***t = -7.3 p < 0.01*** | ***t = -10.6 p < 0.01*** | | t = 1  p = 0.32 | ***t = 2.2 p = 0.04*** | ***t = -7.8 p < 0.01*** | | W=3002 p = 0.06 | W=3192 p = 0.08 | ***W = 930 p = 0.04*** | | ***W=3254***  ***p = 0.02*** | ***W=3612***  ***p < 0.01*** | ***W=1072***  ***p < 0.01*** | |
| Kanger | ***t = -10***  ***p < 0.01*** | ***t = -8.2 p < 0.01*** | ***t = -8.3 p < 0.01*** | | t = -1.7 p = 0.11 | ***t = -3.2 p < 0.01*** | t = -0.77 p = 0.44 | | ***W=2742***  ***p < 0.01*** | ***W=3037***  ***p = 0.01*** | W =77  p = 0.97 | | ***W=3131 p < 0.01*** | ***W=3698 p < 0.01*** | W = 40  p = 0.16 | |
| South Central | ***t = -5.7 p < 0.01*** | ***t = -5, p < 0.01*** | ***t = -10.7 p < 0.01*** | | t = 1.9  p = 0.06 | ***t = 2.9***  ***p = 0.01*** | ***t = -4.5 p < 0.01*** | | W=3796  p = 0.18 | W=3675  p = 0.14 | W=1228  p = 0.22 | | ***W=5416 p < 0.01*** | ***W=5076 p < 0.01*** | W=1329  p = 0.07 | |
| South | t = -1.4 p = 0.19 | t = -0.72 p = 0.47 | ***t = -9***  ***p < 0.01*** | | t = -1.6 p = 0.12 | t = -0.17 p = 0.86 | ***t = -5.8 p < 0.01*** | | W=5216  p = 0.51 | W=4676  p = 0.83 | W=2003  p = 0.18 | | ***W=7596***  ***p < 0.01*** | ***W=7128***  ***p < 0.01*** | ***W=2163***  ***p = 0.05*** | |

**Table ED-8.** Comparison of the number of extreme smoke deposition events pre- and post-2019 using a Wilcoxon Rank-Sum test and comparison of the number of extreme smoke deposition days and events in 2023 relative to the previous 20-year average. Smoke deposition days in 2023 were compared to the average annual number from 2003 – 2022 using a one-sample Student’s t-test. Smoke events in 2023 were compared to the average using Z-scores. Bold italics indicate significantly more smoke events after 2019 (2019 – 2023) than before 2019 (2003 – 2019), and significantly more smoke days in 2023 compared to the previous 20-year average.

|  | 2019 | | | 2023 | | | | | |
| --- | --- | --- | --- | --- | --- | --- | --- | --- | --- |
|  | Smoke Events | | | Smoke Days | | | Smoke Events | | |
|  | **Total** | **Wet** | **Dry** | **Total** | **Wet** | **Dry** | **Total** | **Wet** | **Dry** |
| North | **W = 68.5**  **p = 0.003** | **W = 68.5**  **p = 0.004** | **W = 56.5**  **p = 0.17** | ***t(19) = -7.6***  ***p < 0.01*** | ***t(19) = -7.6***  ***p < 0.01*** | t(19) = 0.52  p < 0.01 | 0 events in 2023 | 0 events in 2023 | 0 events in 2023 |
| Northwest | **W = 48**  **p = 0.51** | **W = 48.5**  **p = 0.48** | **W = 46.5**  **p = 0.59** | ***t(19) = -12***  ***p < 0.01*** | ***t(19) = -14***  ***p < 0.01*** | ***t(19) = -2***  ***p < 0.01*** | Z = 0 | Z = 1.33 | Z = -1.07 |
| Northeast | **W = 54.5**  **p = 0.057** | **W = 62.5**  **p = 0.008** | **W = 45.5**  **p = 0.64** | t(19) = 1.7  p < 0.01 | ***t(19) = -3.9***  ***p < 0.01*** | t(19) = 2.9  p < 0.01 | 0 events in 2023 | 0 events in 2023 | 0 events in 2023 |
| East Central | W = 45.5  p = 0.67 | W = 45.5  p = 0.42 | W = 38.5  p = 0.89 | t(19) = 1.45  p < 0.01 | t(19) = 1.5  p < 0.01 | t(19) = 1.1  p < 0.01 | 0 events overall | 0 events overall | 0 events in 2023 |
| West | **W = 49.5**  **p = 0.44** | **W = 48**  **p = 0.53** | **W = 47**  **p = 0.57** | ***t(19) = -11***  ***p < 0.01*** | ***t(19) = -11***  ***p < 0.01*** | ***t(19) = -5.3***  ***p < 0.01*** | Z = 2.02 | Z = 2.02 | Z = 1.15 |
| Summit | **W = 48**  **p = 0.51** | **W = 48**  **p = 0.51** | **W = 49.5**  **p = 0.4** | ***t(19) = -12***  ***p < 0.01*** | ***t(19) = -12***  ***p < 0.01*** | ***t(19) = -6.4***  ***p < 0.01*** | Z = 1.77 | Z = 1.77 | Z = -0.44 |
| Central | **W = 62.5**  **p = 0.058** | **W = 64**  **p = 0.04** | **W = 50.5**  **p = 0.38** | ***t(19) = -51***  ***p < 0.01*** | ***t(19) = -49***  ***p < 0.01*** | ***t(19) = -16***  ***p < 0.01*** | Z = 1.73 | Z = 1.73 | Z = 1.98 |
| Kanger | **W = 51**  **p = 0.37** | **W = 54**  **p = 0.26** | **W = 57.5**  **p = 0.15** | ***t(19) = -54***  ***p < 0.01*** | ***t(19) = -55***  ***p < 0.01*** | ***t(19) = -34***  ***p < 0.01*** | Z = 2.29 | Z = 2.29 | Z = 2.57 |
| South Central | **W = 45.5**  **p = 0.67** | **W = 0.67**  **p = 0.67** | **W = 56**  **p = 0.16** | ***t(19) = -55***  ***p < 0.01*** | ***t(19) = -55***  ***p < 0.01*** | ***t(19) = -42***  ***p < 0.01*** | Z = 2.69 | Z = 2.69 | Z = 2.76 |
| South | W = 36  p = 0.77 | W = 0.77  p = 0.77 | **W = 45**  **p = 0.69** | ***t(19) = -46***  ***p < 0.01*** | ***t(19) = -45***  ***p < 0.01*** | ***t(19) = -43***  ***p < 0.01*** | Z = 2.9 | Z = 2.91 | Z = 3.08 |

**Table ED-9a.** Adjusted R2 and percentage of deviance in broadband shortwave albedo explained (%) by modeled variables in GAMs using data from 2023 by region and time period (May – September, July and August, individual months from May – September). NA for September GAMs in the Northwest due to lack of data.

|  | May – Sept. | | July & Aug. | | May | | June | | July | | August | | September | |
| --- | --- | --- | --- | --- | --- | --- | --- | --- | --- | --- | --- | --- | --- | --- |
|  | **Adj. R2** | **%Dev. Expl.** | **Adj. R2** | **%Dev. Expl.** | **Adj. R2** | **%Dev. Expl.** | **Adj. R2** | **%Dev. Expl.** | **Adj. R2** | **%Dev. Expl.** | **Adj. R2** | **%Dev. Expl.** | **Adj. R2** | **%Dev. Expl.** |
| South | 0.74 | 74.8 | 0.86 | 87.6 | 0.66 | 75 | 0.81 | 85.9 | 0.898 | 91.1 | 0.917 | 93.1 | 0.277 | 35.9 |
| Northwest | 0.43 | 45.4 | 0.59 | 65 | 0.27 | 47.5 | 0.84 | 91.4 | 0.605 | 67.0 | 0.647 | 71.8 | NA | NA |
| Northeast | 0.65 | 68.5 | 0.75 | 78.3 | 0.51 | 66.7 | 0.82 | 87.2 | 0.911 | 93.7 | 0.698 | 75.6 | 0.496 | 71.1 |
| All AWS | 0.62 | 63.6 | 0.77 | 78.2 | 0.38 | 41.9 | 0.61 | 66.8 | 0.798 | 81.8 | 0.793 | 81.2 | 0.426 | 50 |
| Accum. | 0.28 | 30.4 | 0.36 | 39.1 | 0.16 | 25.4 | 0.32 | 42.8 | 0.427 | 47.7 | 0.373 | 43.2 | 0.462 | 52.6 |
| Ablation | 0.83 | 84.6 | 0.85 | 88.1 | 0.68 | 73.3 | 0.86 | 89.4 | 0.922 | 95.2 | 0.915 | 94.1 | 0.808 | 88.1 |

**Table ED-9b:** Individual percentage contribution (%) of each predictor variable towards overall GAM adjusted R2 by region and time period. NA for September variables in Northwest due to lack of data.

| Period | Region | Daily Smoke (mg/m2) | Air Pressure (hPa) | Air Temp (ºC) | Rel. Hum. (%) | Wind Speed (m/s) | Aggregated Smoke (mg/m2) | DOY |
| --- | --- | --- | --- | --- | --- | --- | --- | --- |
| May – September | **South** | 1.5 | 29.5 | 38.1 | 6.7 | 0.79 | 12.4 | 10.9 |
| **Northwest** | 4.6 | 11.5 | 2.2 | 51.4 | 0.33 | 13.9 | 16.1 |
| **Northeast** | 2.1 | 30.3 | 23.1 | 10 | 0.21 | 9.8 | 24.5 |
| **All AWS** | 2.1 | 29.8 | 39.9 | 6.6 | 0.69 | 15.1 | 5.9 |
| **Accum.** | 1.3 | 33.4 | 21 | 18.4 | 0.07 | 8.1 | 17.7 |
| **Ablation** | 4.3 | 7.1 | 24.2 | 2.9 | 1.1 | 30.8 | 29.6 |
| July & August | **South** | 1.2 | 43.7 | 27.8 | 6.8 | 3.4 | 12.3 | 4.8 |
| **Northwest** | 4.9 | 15.1 | 4.5 | 46.2 | 1.7 | 15.7 | 11.7 |
| **Northeast** | 1.5 | 45.6 | 23.8 | 13.7 | 2.1 | 8.6 | 4.8 |
| **All AWS** | 1.9 | 41 | 29.7 | 8.6 | 1.9 | 15.1 | 1.9 |
| **Accum.** | 1.7 | 29.2 | 19 | 37 | 0.75 | 8.2 | 4.2 |
| **Ablation** | 3.5 | 13 | 8.8 | 5.8 | 8.6 | 46.4 | 13.9 |
| May | **South** | 0.2 | 30.4 | 20.4 | 27.2 | 2.9 | 8.9 | 10 |
| **Northwest** | 8.4 | 14.1 | 31.2 | 26.8 | -4.2 | -4.3 | 28.1 |
| **Northeast** | 5.2 | 16.3 | 6.1 | 39.2 | 1.6 | 14.4 | 17.3 |
| **All AWS** | 4 | 36.9 | 37.1 | 15.6 | 0.3 | 0.001 | 6.1 |
| **Accum.** | 23.3 | 16.1 | 9.4 | -3.3 | 7.5 | 31.6 | 15.5 |
| **Ablation** | -1 | 37.2 | 21.1 | 13.4 | 2.7 | 14.2 | 12.5 |
| June | **South** | -0.2 | 46 | 30.7 | 5.3 | 8.7 | 1.8 | 7.6 |
| **Northwest** | 6.9 | 33.3 | 13.4 | 5.7 | 6.9 | 17.4 | 16.5 |
| **Northeast** | 0.6 | 23.4 | 17.4 | 20.3 | 4.7 | 21.4 | 12.2 |
| **All AWS** | 1.1 | 49.4 | 34.2 | 3.2 | 5.5 | 2.5 | 4.2 |
| **Accum.** | 3.3 | 45.9 | 16.8 | 6.7 | 1.4 | 24.2 | 1.7 |
|  | **Ablation** | 9 | 44 | 23.5 | 1.8 | 7.6 | 7 | 7.2 |
| July | **South** | 0.8 | 38 | 30.6 | 3.4 | 1.3 | 18.8 | 7.1 |
| **Northwest** | 7.2 | 14.5 | 6.6 | 41.4 | 3.2 | 11.6 | 15.5 |
| **Northeast** | 1 | 43.3 | 29.3 | 13.2 | 2.8 | 8.1 | 2.4 |
| **All AWS** | 2 | 38 | 34.9 | 6.3 | 0.7 | 16.1 | 2 |
| **Accum.** | 3.8 | 16.1 | 31.5 | 31.4 | 1.2 | 9.4 | 6.6 |
| **Ablation** | 4.8 | 26.5 | 13.5 | 6.3 | 1 | 29.4 | 18.5 |
| August | **South** | 2.1 | 41.9 | 26.1 | 7.8 | 4.3 | 14.7 | 3.1 |
| **Northwest** | 6.3 | 22.7 | 2.3 | 39.5 | 2.8 | 19.7 | 6.6 |
| **Northeast** | 3.8 | 47.3 | 17 | 15.6 | 1.9 | 11.2 | 3.3 |
| **All AWS** | 2.3 | 38.9 | 27.1 | 9.9 | 3.3 | 17.3 | 1.3 |
| **Accum.** | 2.5 | 32.9 | 6.9 | 38.9 | 2.7 | 13.2 | 2.9 |
| **Ablation** | 4.4 | 11.3 | 7.5 | 6.1 | 11.2 | 54.2 | 5.4 |
| September | **South** | 8.7 | 55.6 | 8.8 | 17 | 3.1 | 3.4 | 3.3 |
| **Northwest** | NA | NA | NA | NA | NA | NA | NA |
| **Northeast** | 6.5 | 37.3 | 18.8 | -8.7 | 26.3 | 14.4 | 5.4 |
| **All AWS** | 3.3 | 24.3 | 38.6 | 7.5 | 0.7 | 16.1 | 9.5 |
| **Accum.** | 4.3 | 23.2 | 38.8 | 1.7 | 1.7 | 18.9 | 11.5 |
| **Ablation** | 5.7 | 12 | 11.4 | 27.4 | 3.2 | 3.1 | 37.2 |
